# Supplementary material for: Lamination and spherulite-like compaction of a hormone’s native amyloid-like nanofibrils: spectroscopic insights into key interactions
Source: Royal Society of Chemistry journal article supplement (doi:10.1039/c3fd00054k), 2013-01-01
Supplement: c3fd00054k.pdf [file c3fd00054k.pdf]

Figure S-1: ATR-FTIR spectrum of nanofibrils (S-14 5% in water) and its decomposition into 4 Gaussian Curves centered at 1620 $\text{cm}^{-1}$  and 1685  $\text{cm}^{-1}$  (antiparallel beta sheet), 1640  $\text{cm}^{-1}$  (random coil) and 1660  $\text{cm}^{-1}$  (beta turn). Form the surfaces under the curves, 5 carbonyls H-bonds are involved in the antiparallel beta sheet, 3 in the turn and 6 in random coil.

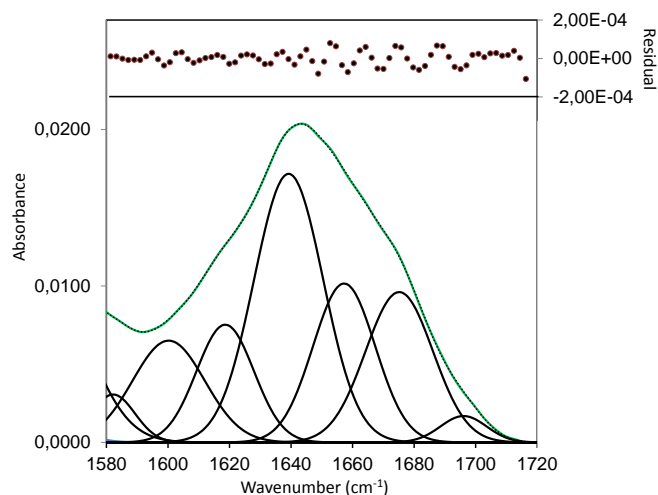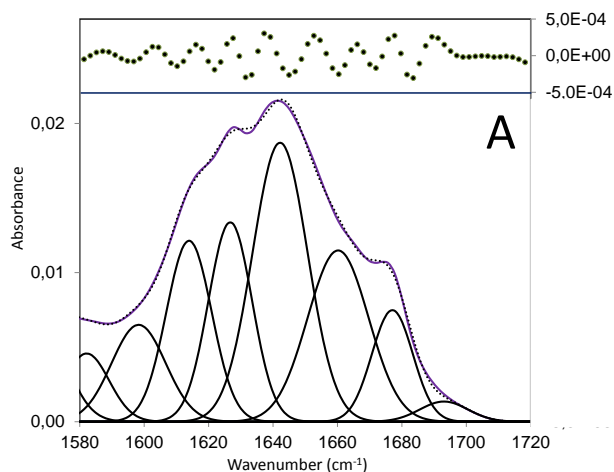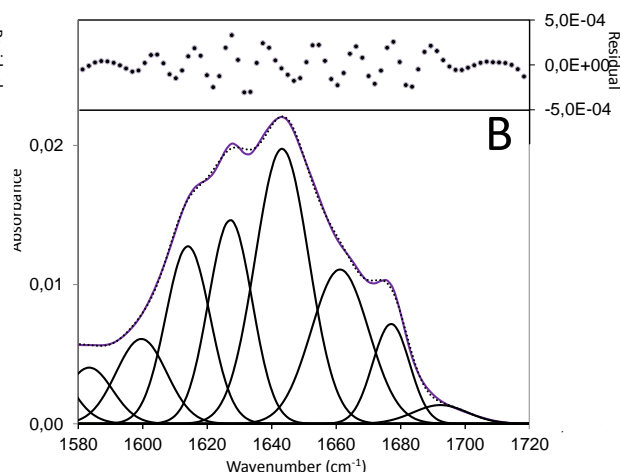

Figure S-2 : ATR-FTIR spectrum of nanofibers (S-14 15% in water (A) an in NaCl 150mM (B)) and their decompositions into 5 Gaussian Curves centered at 1615 $\text{cm}^{-1}$  and 1685  $\text{cm}^{-1}$  (antiparallel beta sheet), 1627 $\text{cm}^{-1}$  (parallel beta sheet), 1640  $\text{cm}^{-1}$  (random coil) and 1660  $\text{cm}^{-1}$  (beta turn). Form the surfaces under the curves, 4 carbonyls H-bonds are involved in the antiparallel beta sheet, 3 in the parallel beta sheet, 3 in the turn and 4 in random coil.

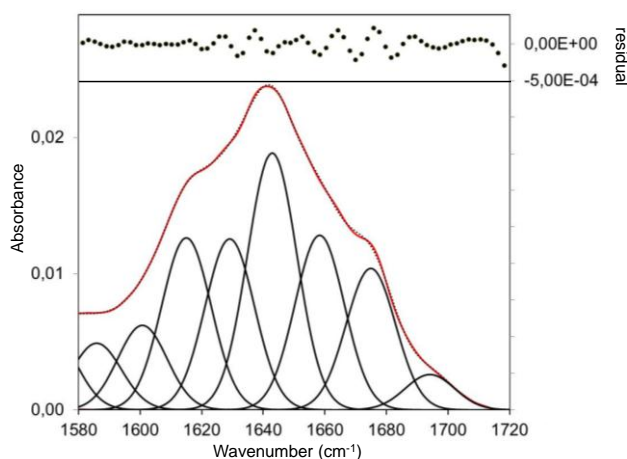

Figure S-3: ATR-FTIR spectrum of spherulites (S-14 5% in NaCl 150mM) and its decomposition into 5 Gaussian Curves centered at 1615 $\text{cm}^{-1}$  and 1685  $\text{cm}^{-1}$  (antiparallel beta sheet), 1627 $\text{cm}^{-1}$  (parallel beta sheet), 1640  $\text{cm}^{-1}$  (random coil) and 1660  $\text{cm}^{-1}$  (beta turn). Form the surfaces under the curves, 4 carbonyls H-bonds are involved in the antiparallel beta sheet, 3 in the parallel beta sheet, 3 in the turn and 4 in random coil.
